# Supplementary figures and images for: 1,5-Anhydro-D-Fructose Exhibits Satiety Effects via the Activation of Oxytocin Neurons in the Paraventricular Nucleus
Source: MDPI journal article supplement (doi:10.3390/ijms24098248), 2023-05-04

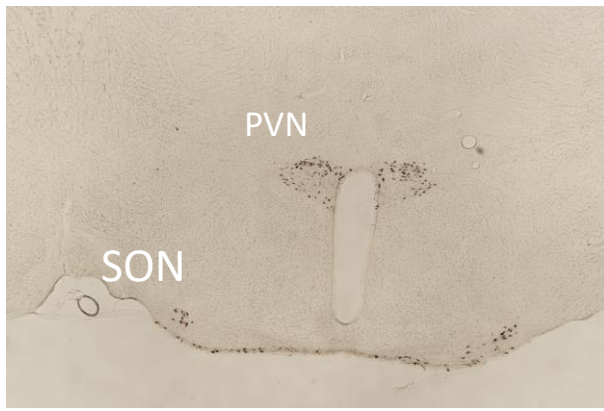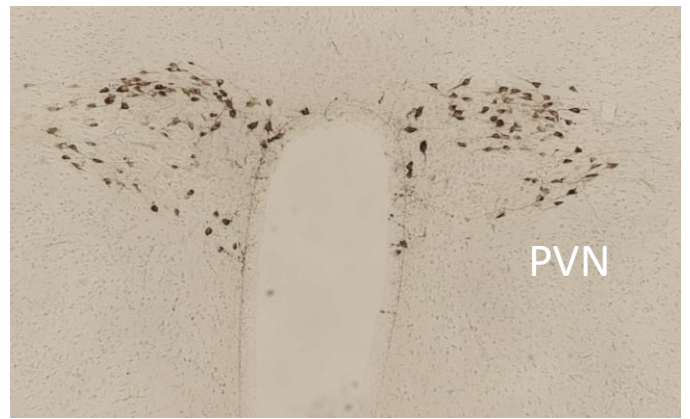

**Supplementary Figure S1. Immunostaining using anti-oxytocin monoclonal antibody**

Supplement: s1 [file s1]
